# Supplementary material
Source: Royal Society of Chemistry journal article supplement (https://www.rsc.org/suppdata/cp/1999/5565/pccp-sup-tb.doc)
Supplement: Supplementary file 2 [file pccp-sup-tb.doc]

**Supplementary Data:**

**Table 2 (Suppl).** Average diameters for CnH2m isomer classes.

| n\2m 2 4 6 8 10 12 14 16 18 |
| --- |
| 2 1.000 1.000 1.000 |
| 3 2.000 2.000 2.000 |
| 4 3.000 3.000 3.000 2.667 2.500 |
| 5 4.000 3.833 3.667 3.400 3.000 |
| 6 5.000 4.800 4.800 4.545 4.304 4.000 3.800 |
| 7 5.500 5.500 5.364 5.136 4.879 4.593 4.333 |
| 8 7.000 6.444 6.312 6.131 5.935 5.686 5.441 5.152 4.833 |
| 9 7.143 7.053 6.885 6.685 6.460 6.213 5.950 5.660 |
| 10 9.000 8.059 7.843 7.618 7.413 7.196 6.965 6.714 6.449 |
| 11 8.870 8.583 8.341 8.119 7.900 7.674 7.439 7.188 |
| 12 11.000 9.741 9.353 9.055 8.814 8.586 8.361 8.131 7.892 |
| 13 10.500 10.072 9.753 9.492 9.255 9.027 8.799 8.567 |
| 14 13.000 11.372 10.826 10.448 10.161 9.910 9.676 9.448 9.220 |
| 15 12.148 11.547 11.134 10.820 10.553 10.311 10.080 9.853 |
| 16 15.000 13.032 12.295 11.817 11.472 11.187 10.934 10.698 10.469 |
| 17 13.795 13.014 12.495 12.117 11.812 11.546 11.303 11.071 |
| 18 17.000 14.641 13.756 13.172 12.758 12.430 12.150 11.898 11.662 |
| 19 15.418 14.472 13.842 13.393 13.042 12.746 12.484 12.242 |
| 20 19.000 16.283 15.208 14.513 14.025 13.648 13.336 13.062 12.812 |
| 21 17.067 15.922 15.178 14.653 14.250 13.919 13.633 13.375 |
| 22 21.000 17.914 16.655 15.843 15.278 14.848 14.498 14.198 13.930 |
| 23 18.706 17.369 16.505 15.900 15.442 15.071 14.757 14.480 |
| 24 23.000 19.552 18.099 17.167 16.520 16.032 15.641 15.312 15.023 |
| 25 20.326 18.812 17.825 17.137 16.620 16.207 15.862 15.561 |

| n\2m 20 22 24 26 28 30 32 34 36 |
| --- |
| 9 5.343 |
| 10 6.156 5.840 |
| 11 6.922 6.633 6.308 |
| 12 7.642 7.378 7.092 6.772 |
| 13 8.327 8.077 7.814 7.530 7.207 |
| 14 8.987 8.748 8.498 8.236 7.955 7.637 |
| 15 9.625 9.393 9.154 8.905 8.645 8.365 8.051 |
| 16 10.243 10.016 9.785 9.547 9.300 9.041 8.764 8.453 |
| 17 10.846 10.622 10.396 10.166 9.929 9.684 9.426 9.151 8.844 |
| 18 11.435 11.211 10.989 10.764 10.535 10.300 10.057 9.801 9.529 |
| 19 12.011 11.788 11.567 11.346 11.123 10.896 10.662 10.420 10.166 |
| 20 12.578 12.353 12.132 11.914 11.695 11.473 11.247 11.015 10.774 |
| 21 13.135 12.907 12.686 12.469 12.252 12.035 11.815 11.590 11.359 |
| 22 13.684 13.453 13.230 13.012 12.798 12.583 12.368 12.149 11.926 |
| 23 14.226 13.990 13.765 13.546 13.332 13.120 12.907 12.693 12.476 |
| 24 14.762 14.520 14.291 14.071 13.857 13.645 13.435 13.225 13.012 |
| 25 15.292 15.044 14.811 14.588 14.373 14.161 13.953 13.745 13.536 |

| n\2m 38 40 42 44 46 48 50 52 |
| --- |
| 18 9.226 |
| 19 9.896 9.597 |
| 20 10.523 10.255 9.959 |
| 21 11.121 10.870 10.605 10.313 |
| 22 11.696 11.459 11.211 10.947 10.660 |
| 23 12.254 12.026 11.790 11.544 11.283 10.998 |
| 24 12.796 12.576 12.350 12.115 11.870 11.611 11.330 |
| 25 13.325 13.111 12.892 12.667 12.434 12.191 11.934 11.656 |

**Table 3 (Suppl).** Standard deviations for diameters of CnH2m isomer

classes.

| n\2m 2 4 6 8 10 12 14 16 18 |
| --- |
| 2 0.000 0.000 0.000 |
| 3 0.000 0.000 0.000 |
| 4 0.000 0.000 0.000 0.471 0.500 |
| 5 0.000 0.373 0.471 0.490 0.816 |
| 6 0.000 0.400 0.400 0.498 0.621 0.679 0.748 |
| 7 0.866 0.707 0.697 0.672 0.721 0.733 0.816 |
| 8 0.000 0.831 0.893 0.839 0.825 0.820 0.825 0.839 0.957 |
| 9 1.245 1.012 0.980 0.937 0.933 0.917 0.931 0.930 |
| 10 0.000 1.162 1.171 1.113 1.076 1.039 1.022 1.009 1.014 |
| 11 1.296 1.250 1.239 1.193 1.163 1.128 1.107 1.090 |
| 12 0.000 1.294 1.380 1.357 1.321 1.281 1.246 1.215 1.191 |
| 13 1.518 1.486 1.479 1.436 1.398 1.358 1.324 1.293 |
| 14 0.000 1.525 1.609 1.590 1.554 1.512 1.471 1.432 1.398 |
| 15 1.715 1.712 1.706 1.666 1.624 1.580 1.540 1.502 |
| 16 0.000 1.690 1.822 1.815 1.779 1.734 1.690 1.646 1.606 |
| 17 1.911 1.921 1.923 1.886 1.842 1.796 1.752 1.709 |
| 18 0.000 1.926 2.027 2.028 1.994 1.948 1.901 1.856 1.812 |
| 19 2.095 2.127 2.133 2.097 2.053 2.005 1.958 1.912 |
| 20 0.000 2.099 2.229 2.235 2.201 2.155 2.106 2.058 2.012 |
| 21 2.271 2.330 2.338 2.303 2.256 2.207 2.157 2.110 |
| 22 0.000 2.292 2.430 2.438 2.404 2.356 2.306 2.255 2.206 |
| 23 2.443 2.530 2.540 2.504 2.455 2.403 2.352 2.302 |
| 24 0.000 2.464 2.628 2.638 2.603 2.553 2.500 2.447 2.396 |
| 25 2.646 2.728 2.738 2.701 2.650 2.595 2.541 2.489 |

| n\2m 20 22 24 26 28 30 32 34 36 |
| --- |
| 9 1.013 |
| 10 1.022 1.084 |
| 11 1.089 1.090 1.149 |
| 12 1.172 1.165 1.165 1.209 |
| 13 1.269 1.248 1.237 1.232 1.267 |
| 14 1.368 1.342 1.322 1.308 1.302 1.327 |
| 15 1.468 1.437 1.412 1.390 1.376 1.367 1.384 |
| 16 1.569 1.535 1.504 1.478 1.456 1.441 1.431 1.443 |
| 17 1.670 1.633 1.599 1.569 1.542 1.520 1.503 1.492 1.499 |
| 18 1.770 1.731 1.695 1.662 1.631 1.604 1.581 1.563 1.551 |
| 19 1.869 1.829 1.791 1.755 1.722 1.692 1.665 1.641 1.622 |
| 20 1.967 1.925 1.886 1.848 1.813 1.781 1.750 1.723 1.699 |
| 21 2.064 2.021 1.980 1.941 1.904 1.870 1.837 1.807 1.780 |
| 22 2.160 2.115 2.073 2.033 1.995 1.959 1.925 1.893 1.863 |
| 23 2.254 2.209 2.165 2.124 2.085 2.048 2.012 1.978 1.947 |
| 24 2.347 2.301 2.256 2.214 2.174 2.136 2.099 2.064 2.031 |
| 25 2.439 2.392 2.347 2.303 2.262 2.223 2.185 2.149 2.115 |

| n\2m 38 40 42 44 46 48 50 52 |
| --- |
| 18 1.555 |
| 19 1.609 1.608 |
| 20 1.679 1.665 1.662 |
| 21 1.755 1.735 1.719 1.714 |
| 22 1.835 1.811 1.789 1.773 1.765 |
| 23 1.917 1.889 1.864 1.843 1.825 1.816 |
| 24 1.999 1.970 1.942 1.917 1.895 1.877 1.866 |
| 25 2.082 2.051 2.021 1.993 1.968 1.946 1.927 1.914 |

**Table 4 (Suppl)**. Average Degree of Branching data for isomer classes.

| n\2m 2 4 6 8 10 12 14 16 18 |
| --- |
| 2 0.000 0.000 0.000 |
| 3 0.000 0.000 0.000 |
| 4 0.000 0.000 0.000 0.333 0.500 |
| 5 0.000 0.167 0.333 0.600 1.000 |
| 6 0.000 0.200 0.200 0.455 0.696 1.000 1.200 |
| 7 0.250 0.375 0.545 0.788 1.052 1.333 1.556 |
| 8 0.000 0.333 0.458 0.672 0.890 1.152 1.408 1.697 2.000 |
| 9 0.429 0.592 0.782 1.006 1.249 1.510 1.780 2.065 |
| 10 0.000 0.529 0.679 0.899 1.118 1.360 1.611 1.879 2.152 |
| 11 0.565 0.796 1.010 1.235 1.472 1.721 1.980 2.250 |
| 12 0.000 0.630 0.883 1.121 1.349 1.586 1.832 2.087 2.351 |
| 13 0.667 0.984 1.229 1.464 1.701 1.945 2.197 2.457 |
| 14 0.000 0.744 1.067 1.334 1.576 1.816 2.060 2.310 2.567 |
| 15 0.778 1.154 1.436 1.686 1.930 2.175 2.424 2.678 |
| 16 0.000 0.825 1.231 1.534 1.795 2.043 2.289 2.538 2.791 |
| 17 0.859 1.308 1.629 1.901 2.155 2.404 2.653 2.905 |
| 18 0.000 0.913 1.379 1.721 2.004 2.265 2.517 2.767 3.019 |
| 19 0.936 1.448 1.809 2.105 2.373 2.629 2.882 3.134 |
| 20 0.000 0.976 1.512 1.895 2.204 2.480 2.740 2.995 3.248 |
| 21 1.000 1.574 1.977 2.300 2.584 2.850 3.108 3.362 |
| 22 0.000 1.040 1.633 2.057 2.393 2.687 2.958 3.219 3.476 |
| 23 1.060 1.689 2.134 2.484 2.787 3.065 3.330 3.589 |
| 24 0.000 1.091 1.743 2.208 2.573 2.885 3.170 3.439 3.701 |
| 25 1.110 1.794 2.279 2.659 2.982 3.273 3.547 3.812 |

| n\2m 20 22 24 26 28 30 32 34 36 |
| --- |
| 9 2.343 |
| 10 2.440 2.720 |
| 11 2.526 2.812 3.101 |
| 12 2.623 2.901 3.188 3.476 |
| 13 2.725 2.998 3.278 3.564 3.854 |
| 14 2.830 3.100 3.375 3.656 3.942 4.233 |
| 15 2.939 3.205 3.476 3.753 4.034 4.320 4.611 |
| 16 3.049 3.312 3.580 3.853 4.131 4.413 4.699 4.990 |
| 17 3.161 3.422 3.687 3.957 4.232 4.510 4.792 5.079 5.370 |
| 18 3.274 3.533 3.796 4.064 4.335 4.610 4.889 5.172 5.459 |
| 19 3.388 3.646 3.907 4.172 4.441 4.713 4.990 5.269 5.552 |
| 20 3.503 3.759 4.019 4.282 4.549 4.819 5.092 5.369 5.650 |
| 21 3.617 3.873 4.132 4.393 4.658 4.926 5.197 5.472 5.749 |
| 22 3.731 3.987 4.245 4.506 4.769 5.035 5.304 5.576 5.852 |
| 23 3.845 4.102 4.359 4.619 4.880 5.145 5.412 5.683 5.956 |
| 24 3.959 4.216 4.473 4.732 4.993 5.256 5.522 5.790 6.062 |
| 25 4.072 4.330 4.587 4.846 5.106 5.368 5.633 5.899 6.169 |

| n\2m 38 40 42 44 46 48 50 52 |
| --- |
| 18 5.749 |
| 19 5.839 6.130 |
| 20 5.933 6.220 6.510 |
| 21 6.030 6.314 6.601 6.891 |
| 22 6.130 6.411 6.695 6.982 7.272 |
| 23 6.232 6.510 6.792 7.076 7.363 7.653 |
| 24 6.336 6.612 6.891 7.173 7.457 7.744 8.034 |
| 25 6.441 6.716 6.993 7.272 7.554 7.839 8.126 8.416 |

**Table 5 (Suppl)**. Standard deviations for Degree of Branching data for

isomer classes.

| n\2m 2 4 6 8 10 12 14 16 18 |
| --- |
| 2 0.000 0.000 0.000 |
| 3 0.000 0.000 0.000 |
| 4 0.000 0.000 0.000 0.471 0.500 |
| 5 0.000 0.373 0.471 0.490 0.816 |
| 6 0.000 0.400 0.400 0.498 0.621 0.679 0.748 |
| 7 0.433 0.484 0.566 0.591 0.680 0.720 0.831 |
| 8 0.000 0.471 0.576 0.593 0.646 0.694 0.747 0.797 0.943 |
| 9 0.623 0.589 0.639 0.664 0.715 0.754 0.810 0.853 |
| 10 0.000 0.606 0.653 0.671 0.703 0.737 0.778 0.819 0.869 |
| 11 0.648 0.666 0.708 0.729 0.763 0.795 0.835 0.874 |
| 12 0.000 0.618 0.714 0.736 0.762 0.788 0.819 0.852 0.890 |
| 13 0.667 0.726 0.767 0.788 0.814 0.841 0.872 0.905 |
| 14 0.000 0.650 0.764 0.792 0.817 0.839 0.864 0.892 0.922 |
| 15 0.685 0.771 0.818 0.841 0.864 0.887 0.912 0.940 |
| 16 0.000 0.656 0.798 0.840 0.866 0.888 0.910 0.933 0.959 |
| 17 0.693 0.805 0.862 0.889 0.911 0.932 0.954 0.977 |
| 18 0.000 0.670 0.825 0.880 0.911 0.933 0.954 0.974 0.997 |
| 19 0.691 0.831 0.898 0.931 0.955 0.975 0.995 1.016 |
| 20 0.000 0.670 0.846 0.914 0.951 0.975 0.995 1.015 1.035 |
| 21 0.693 0.850 0.929 0.969 0.995 1.015 1.034 1.054 |
| 22 0.000 0.673 0.861 0.943 0.986 1.013 1.035 1.054 1.072 |
| 23 0.689 0.865 0.955 1.002 1.031 1.053 1.072 1.090 |
| 24 0.000 0.669 0.873 0.966 1.017 1.048 1.071 1.091 1.109 |
| 25 0.685 0.876 0.977 1.031 1.065 1.089 1.108 1.126 |

| n\2m 20 22 24 26 28 30 32 34 36 |
| --- |
| 9 0.954 |
| 10 0.920 1.014 |
| 11 0.922 0.966 1.053 |
| 12 0.929 0.973 1.020 1.094 |
| 13 0.941 0.978 1.021 1.065 1.135 |
| 14 0.954 0.989 1.026 1.067 1.111 1.175 |
| 15 0.970 1.002 1.036 1.072 1.111 1.153 1.211 |
| 16 0.986 1.016 1.047 1.080 1.115 1.154 1.195 1.249 |
| 17 1.003 1.030 1.059 1.090 1.123 1.157 1.194 1.235 1.285 |
| 18 1.020 1.046 1.073 1.102 1.132 1.164 1.198 1.234 1.273 |
| 19 1.038 1.062 1.087 1.114 1.143 1.172 1.204 1.237 1.272 |
| 20 1.056 1.078 1.102 1.128 1.154 1.182 1.212 1.242 1.275 |
| 21 1.074 1.095 1.118 1.141 1.167 1.193 1.221 1.249 1.280 |
| 22 1.091 1.112 1.133 1.156 1.179 1.204 1.231 1.258 1.286 |
| 23 1.109 1.128 1.149 1.170 1.193 1.217 1.241 1.267 1.294 |
| 24 1.127 1.145 1.165 1.185 1.207 1.229 1.253 1.277 1.303 |
| 25 1.144 1.162 1.180 1.200 1.221 1.242 1.265 1.288 1.312 |

| n\2m 38 40 42 44 46 48 50 52 |
| --- |
| 18 1.321 |
| 19 1.311 1.356 |
| 20 1.309 1.347 1.391 |
| 21 1.312 1.346 1.382 1.424 |
| 22 1.316 1.347 1.381 1.417 1.457 |
| 23 1.322 1.352 1.382 1.415 1.450 1.489 |
| 24 1.329 1.357 1.386 1.416 1.448 1.483 1.521 |
| 25 1.338 1.364 1.391 1.420 1.450 1.481 1.515 1.552 |

**Table 6 (Suppl).** Average number of multiplicity-3 bonds.

| n\2m 2 4 6 8 10 12 14 16 18 |
| --- |
| 2 1.000 0.000 0.000 |
| 3 0.500 0.000 0.000 |
| 4 2.000 0.500 0.500 0.000 0.000 |
| 5 1.250 0.667 0.333 0.000 0.000 |
| 6 3.000 1.400 1.133 0.545 0.304 0.000 0.000 |
| 7 2.000 1.375 0.927 0.515 0.241 0.000 0.000 |
| 8 4.000 2.111 1.792 1.221 0.830 0.452 0.211 0.000 0.000 |
| 9 2.786 2.092 1.567 1.112 0.736 0.417 0.180 0.000 |
| 10 5.000 3.000 2.493 1.889 1.431 1.013 0.671 0.375 0.160 |
| 11 3.522 2.820 2.243 1.744 1.312 0.935 0.614 0.345 |
| 12 6.000 3.741 3.207 2.585 2.074 1.616 1.218 0.866 0.567 |
| 13 4.306 3.555 2.938 2.404 1.931 1.509 1.136 0.808 |
| 14 7.000 4.581 3.938 3.288 2.742 2.250 1.811 1.417 1.066 |
| 15 5.074 4.297 3.646 3.081 2.576 2.120 1.708 1.337 |
| 16 8.000 5.349 4.677 4.004 3.426 2.906 2.435 2.007 1.617 |
| 17 5.859 5.045 4.364 3.773 3.240 2.755 2.312 1.907 |
| 18 9.000 6.185 5.423 4.726 4.123 3.578 3.080 2.624 2.203 |
| 19 6.645 5.796 5.090 4.475 3.919 3.409 2.940 2.506 |
| 20 10.000 6.961 6.174 5.455 4.829 4.262 3.741 3.260 2.814 |
| 21 7.427 6.551 5.822 5.185 4.608 4.077 3.585 3.127 |
| 22 11.000 7.782 6.930 6.189 5.543 4.956 4.415 3.913 3.445 |
| 23 8.214 7.309 6.558 5.902 5.306 4.755 4.244 3.765 |
| 24 12.000 8.565 7.688 6.927 6.262 5.657 5.098 4.577 4.089 |
| 25 9.008 8.069 7.298 6.624 6.011 5.443 4.913 4.417 |

| n\2m 20 22 24 26 28 30 32 34 36 |
| --- |
| 9 0.000 |
| 10 0.000 0.000 |
| 11 0.141 0.000 0.000 |
| 12 0.316 0.127 0.000 0.000 |
| 13 0.526 0.293 0.115 0.000 0.000 |
| 14 0.757 0.492 0.271 0.105 0.000 0.000 |
| 15 1.005 0.712 0.461 0.253 0.097 0.000 0.000 |
| 16 1.265 0.950 0.672 0.434 0.237 0.090 0.000 0.000 |
| 17 1.537 1.202 0.902 0.637 0.410 0.223 0.083 0.000 0.000 |
| 18 1.818 1.465 1.145 0.858 0.605 0.388 0.210 0.078 0.000 |
| 19 2.106 1.738 1.400 1.094 0.818 0.576 0.368 0.199 0.073 |
| 20 2.401 2.018 1.665 1.341 1.047 0.782 0.550 0.351 0.189 |
| 21 2.702 2.306 1.938 1.599 1.287 1.004 0.750 0.526 0.335 |
| 22 3.007 2.599 2.219 1.865 1.538 1.238 0.964 0.719 0.504 |
| 23 3.317 2.898 2.505 2.139 1.798 1.482 1.192 0.928 0.692 |
| 24 3.632 3.201 2.798 2.419 2.065 1.735 1.430 1.150 0.895 |
| 25 3.949 3.509 3.095 2.705 2.339 1.997 1.678 1.382 1.110 |

| n\2m 38 40 42 44 46 48 50 52 |
| --- |
| 18 0.000 |
| 19 0.000 0.000 |
| 20 0.069 0.000 0.000 |
| 21 0.180 0.065 0.000 0.000 |
| 22 0.320 0.171 0.062 0.000 0.000 |
| 23 0.484 0.307 0.163 0.059 0.000 0.000 |
| 24 0.666 0.465 0.294 0.156 0.056 0.000 0.000 |
| 25 0.863 0.642 0.448 0.283 0.150 0.054 0.000 0.000 |

**Table 7 (Suppl).** Average number of tetrahedrally hybridized sites.

| n/2m 2 4 6 8 10 12 14 16 18 |
| --- |
| 2 0.000 0.000 2.000 |
| 3 0.500 1.000 3.000 |
| 4 0.000 0.000 1.250 2.000 4.000 |
| 5 0.500 0.833 2.000 3.000 5.000 |
| 6 0.000 0.000 1.000 1.591 2.826 4.000 6.000 |
| 7 0.375 0.708 1.600 2.455 3.707 5.000 7.000 |
| 8 0.000 0.000 0.771 1.385 2.315 3.300 4.599 6.000 8.000 |
| 9 0.357 0.605 1.322 2.102 3.090 4.192 5.525 7.000 |
| 10 0.000 0.000 0.642 1.187 1.973 2.857 3.910 5.082 6.462 |
| 11 0.261 0.524 1.132 1.833 2.684 3.651 4.759 5.996 |
| 12 0.000 0.000 0.533 1.044 1.728 2.519 3.439 4.470 5.631 |
| 13 0.250 0.459 0.988 1.623 2.383 3.249 4.228 5.314 |
| 14 0.000 0.000 0.461 0.922 1.537 2.257 3.084 4.011 5.042 |
| 15 0.204 0.406 0.875 1.455 2.146 2.935 3.821 4.800 |
| 16 0.000 0.000 0.400 0.825 1.383 2.043 2.801 3.648 4.586 |
| 17 0.192 0.363 0.784 1.316 1.951 2.678 3.493 4.392 |
| 18 0.000 0.000 0.355 0.744 1.256 1.866 2.566 3.350 4.215 |
| 19 0.164 0.327 0.709 1.200 1.788 2.463 3.220 4.054 |
| 20 0.000 0.000 0.317 0.676 1.149 1.716 2.368 3.099 3.905 |
| 21 0.153 0.297 0.646 1.101 1.649 2.280 2.988 3.768 |
| 22 0.000 0.000 0.287 0.618 1.057 1.587 2.198 2.884 3.640 |
| 23 0.134 0.271 0.593 1.016 1.529 2.121 2.787 3.521 |
| 24 0.000 0.000 0.261 0.569 0.978 1.475 2.050 2.696 3.409 |
| 25 0.129 0.250 0.547 0.942 1.424 1.982 2.611 3.305 |

| n/2m 20 22 24 26 28 30 32 34 36 |
| --- |
| 9 9.000 |
| 10 8.000 10.000 |
| 11 7.413 9.000 11.000 |
| 12 6.918 8.372 10.000 12.000 |
| 13 6.520 7.851 9.338 11.000 13.000 |
| 14 6.176 7.423 8.792 10.310 12.000 14.000 |
| 15 5.877 7.053 8.338 9.741 11.285 13.000 15.000 |
| 16 5.612 6.730 7.944 9.262 10.695 12.265 14.000 16.000 |
| 17 5.374 6.442 7.597 8.845 10.194 11.654 13.247 15.000 17.000 |
| 18 5.159 6.183 7.288 8.477 9.756 11.133 12.618 14.231 16.000 |
| 19 4.964 5.948 7.009 8.148 9.368 10.675 12.077 13.585 15.217 |
| 20 4.784 5.733 6.755 7.850 9.019 10.268 11.602 13.027 14.556 |
| 21 4.618 5.536 6.522 7.577 8.703 9.901 11.177 12.534 13.981 |
| 22 4.464 5.353 6.308 7.327 8.413 9.568 10.792 12.092 13.472 |
| 23 4.320 5.183 6.109 7.096 8.147 9.261 10.442 11.692 13.014 |
| 24 4.186 5.025 5.923 6.882 7.900 8.979 10.120 11.325 12.598 |
| 25 4.061 4.876 5.750 6.682 7.670 8.717 9.823 10.988 12.217 |

| n/2m 38 40 42 44 46 48 50 52 |
| --- |
| 18 18.000 |
| 19 17.000 19.000 |
| 20 16.205 18.000 20.000 |
| 21 15.529 17.194 19.000 21.000 |
| 22 14.939 16.505 18.184 20.000 22.000 |
| 23 14.415 15.901 17.483 19.175 21.000 23.000 |
| 24 13.942 15.362 16.865 18.462 20.167 22.000 24.000 |
| 25 13.511 14.874 16.312 17.832 19.444 21.160 23.000 25.000 |

**Table 8 (Suppl).** Standard deviations for number of multiplicity-3 bonds.

| n/2m 2 4 6 8 10 12 14 16 18 |
| --- |
| 2 0.000 0.000 0.000 |
| 3 0.000 0.500 0.000 0.000 |
| 4 0.000 0.500 0.500 0.000 0.000 |
| 5 0.000 0.829 0.471 0.471 0.000 0.000 |
| 6 0.000 0.800 0.718 0.498 0.460 0.000 0.000 |
| 7 0.000 1.000 0.696 0.684 0.500 0.428 0.000 0.000 |
| 8 0.000 0.994 0.865 0.719 0.649 0.498 0.408 0.000 0.000 |
| 9 0.000 1.206 0.876 0.821 0.700 0.626 0.493 0.384 0.000 |
| 10 0.000 1.188 1.013 0.873 0.795 0.696 0.609 0.484 0.366 |
| 11 0.000 1.347 1.039 0.960 0.855 0.778 0.684 0.594 0.475 |
| 12 0.000 1.350 1.149 1.019 0.931 0.844 0.764 0.675 0.582 |
| 13 0.000 1.524 1.191 1.091 0.992 0.913 0.833 0.753 0.666 |
| 14 0.000 1.529 1.288 1.151 1.058 0.976 0.900 0.823 0.743 |
| 15 0.000 1.676 1.337 1.219 1.118 1.038 0.962 0.889 0.813 |
| 16 0.000 1.692 1.423 1.280 1.180 1.097 1.023 0.951 0.879 |
| 17 0.000 1.845 1.479 1.343 1.239 1.156 1.081 1.011 0.941 |
| 18 0.000 1.865 1.559 1.404 1.298 1.212 1.137 1.068 1.000 |
| 19 0.000 1.998 1.619 1.466 1.355 1.268 1.192 1.123 1.057 |
| 20 0.000 2.025 1.694 1.526 1.412 1.322 1.246 1.177 1.111 |
| 21 0.000 2.161 1.757 1.587 1.468 1.376 1.299 1.229 1.164 |
| 22 0.000 2.194 1.830 1.647 1.523 1.429 1.350 1.281 1.216 |
| 23 0.000 2.318 1.893 1.706 1.578 1.482 1.401 1.331 1.266 |
| 24 0.000 2.356 1.964 1.766 1.633 1.533 1.452 1.380 1.315 |
| 25 0.000 2.482 2.029 1.825 1.688 1.585 1.501 1.429 1.363 |

| n/2m 20 22 24 26 28 30 32 34 36 |
| --- |
| 9 0.000 |
| 10 0.000 0.000 |
| 11 0.348 0.000 0.000 |
| 12 0.465 0.333 0.000 0.000 |
| 13 0.570 0.455 0.319 0.000 0.000 |
| 14 0.656 0.560 0.445 0.307 0.000 0.000 |
| 15 0.734 0.647 0.550 0.435 0.296 0.000 0.000 |
| 16 0.805 0.725 0.638 0.540 0.425 0.286 0.000 0.000 |
| 17 0.870 0.796 0.717 0.629 0.531 0.416 0.277 0.000 0.000 |
| 18 0.932 0.862 0.788 0.708 0.621 0.522 0.408 0.268 0.000 |
| 19 0.991 0.924 0.854 0.780 0.700 0.612 0.514 0.399 0.261 |
| 20 1.047 0.982 0.916 0.846 0.772 0.692 0.604 0.505 0.391 |
| 21 1.101 1.038 0.974 0.908 0.839 0.765 0.684 0.596 0.497 |
| 22 1.153 1.092 1.030 0.967 0.901 0.831 0.757 0.677 0.589 |
| 23 1.204 1.144 1.084 1.023 0.960 0.894 0.824 0.750 0.669 |
| 24 1.254 1.194 1.135 1.076 1.015 0.952 0.887 0.817 0.743 |
| 25 1.302 1.243 1.185 1.127 1.069 1.008 0.946 0.880 0.810 |

| n/2m 38 40 42 44 46 48 50 52 |
| --- |
| 18 0.000 |
| 19 0.000 0.000 |
| 20 0.254 0.000 0.000 |
| 21 0.384 0.247 0.000 0.000 |
| 22 0.490 0.377 0.241 0.000 0.000 |
| 23 0.581 0.482 0.370 0.236 0.000 0.000 |
| 24 0.662 0.574 0.475 0.363 0.230 0.000 0.000 |
| 25 0.736 0.655 0.567 0.469 0.357 0.225 0.000 0.000 |

**Table 9 (Suppl).** Standard deviations of numbers of tetrahedrally

hybridized sites.

| n/2m 2 4 6 8 10 12 14 16 18 |
| --- |
| 2 0.000 0.000 0.000 |
| 3 0.000 0.500 0.000 0.000 |
| 4 0.000 0.000 0.829 0.000 0.000 |
| 5 0.000 0.500 0.373 0.816 0.000 0.000 |
| 6 0.000 0.000 0.816 0.651 0.867 0.000 0.000 |
| 7 0.000 0.484 0.455 0.886 0.722 0.831 0.000 0.000 |
| 8 0.000 0.000 0.770 0.706 0.925 0.799 0.813 0.000 0.000 |
| 9 0.000 0.479 0.489 0.837 0.835 0.945 0.830 0.781 0.000 |
| 10 0.000 0.000 0.727 0.738 0.912 0.928 0.966 0.855 0.753 |
| 11 0.000 0.439 0.499 0.813 0.874 0.975 0.982 0.978 0.864 |
| 12 0.000 0.000 0.677 0.743 0.906 0.972 1.029 1.024 0.990 |
| 13 0.000 0.433 0.498 0.781 0.884 0.990 1.042 1.071 1.051 |
| 14 0.000 0.000 0.640 0.736 0.894 0.988 1.062 1.098 1.106 |
| 15 0.000 0.403 0.491 0.756 0.880 0.993 1.069 1.121 1.142 |
| 16 0.000 0.000 0.602 0.723 0.881 0.990 1.077 1.136 1.171 |
| 17 0.000 0.394 0.481 0.731 0.870 0.990 1.080 1.148 1.191 |
| 18 0.000 0.000 0.572 0.707 0.865 0.985 1.082 1.156 1.208 |
| 19 0.000 0.370 0.469 0.709 0.856 0.981 1.082 1.161 1.220 |
| 20 0.000 0.000 0.543 0.690 0.849 0.976 1.080 1.164 1.229 |
| 21 0.000 0.360 0.457 0.687 0.840 0.971 1.078 1.166 1.235 |
| 22 0.000 0.000 0.519 0.672 0.833 0.964 1.075 1.166 1.239 |
| 23 0.000 0.341 0.445 0.667 0.824 0.958 1.070 1.165 1.242 |
| 24 0.000 0.000 0.497 0.655 0.816 0.951 1.066 1.163 1.244 |
| 25 0.000 0.335 0.433 0.649 0.807 0.944 1.061 1.160 1.244 |

| n/2m 20 22 24 26 28 30 32 34 36 |
| --- |
| 9 0.000 |
| 10 0.000 0.000 |
| 11 0.724 0.000 0.000 |
| 12 0.867 0.698 0.000 0.000 |
| 13 0.996 0.865 0.674 0.000 0.000 |
| 14 1.072 0.999 0.859 0.651 0.000 0.000 |
| 15 1.133 1.086 1.000 0.851 0.631 0.000 0.000 |
| 16 1.177 1.154 1.096 0.998 0.842 0.612 0.000 0.000 |
| 17 1.211 1.205 1.170 1.102 0.995 0.832 0.594 0.000 0.000 |
| 18 1.238 1.245 1.228 1.183 1.106 0.990 0.821 0.578 0.000 |
| 19 1.258 1.276 1.273 1.246 1.192 1.107 0.984 0.810 0.563 |
| 20 1.274 1.302 1.309 1.296 1.260 1.199 1.107 0.977 0.799 |
| 21 1.287 1.322 1.339 1.337 1.316 1.272 1.203 1.105 0.970 |
| 22 1.297 1.338 1.363 1.371 1.361 1.332 1.281 1.206 1.102 |
| 23 1.304 1.351 1.382 1.398 1.398 1.381 1.345 1.288 1.207 |
| 24 1.310 1.361 1.398 1.421 1.429 1.422 1.398 1.355 1.293 |
| 25 1.313 1.369 1.411 1.440 1.455 1.456 1.442 1.412 1.364 |

| n/2m 38 40 42 44 46 48 50 52 |
| --- |
| 18 0.000 |
| 19 0.000 0.000 |
| 20 0.549 0.000 0.000 |
| 21 0.788 0.536 0.000 0.000 |
| 22 0.962 0.777 0.524 0.000 0.000 |
| 23 1.098 0.954 0.766 0.512 0.000 0.000 |
| 24 1.207 1.093 0.946 0.755 0.501 0.000 0.000 |
| 25 1.296 1.206 1.088 0.938 0.745 0.491 0.000 0.000 |
